# Supplementary material for: Assessing the use of cell phones to monitor health and nutrition interventions: Evidence from rural Guatemala
Source: PubMed Central journal article supplement (PMC7608922; doi:10.1371/journal.pone.0240526), 2020-11-03
Supplement: pone.0240526.s014.pdf [file pone.0240526.s014.pdf]

## Dataset dictionary

| Variable     | Definition                                                                                                                                                                                                                                                                                                                      |
|--------------|---------------------------------------------------------------------------------------------------------------------------------------------------------------------------------------------------------------------------------------------------------------------------------------------------------------------------------|
| HHID         | Household identifier                                                                                                                                                                                                                                                                                                            |
| intervention | Monitored intervention (Categories 1-13)<br>1= Folic Acid<br>2= Exclusive breastfeeding<br>3= Control visit throughout pregnancy<br>4= Powdered micronutrients<br>5= Ferrous sulphate<br>6= BCG<br>7= DPT 10<br>8= Pentavalent<br>9= Polio<br>10= OPV 10<br>11= Rotavirus<br>12= MMR (Measles, Mumps, Rubella)<br>13= Vitamin A |
| treatment    | 1= Phone calls, 2= Text messages                                                                                                                                                                                                                                                                                                |
| reminders    | 1= Household received SMS reminder, 0= Household did not receive SMS reminder                                                                                                                                                                                                                                                   |
| validanswer  | 1= Valid answer, 0= Invalid answer                                                                                                                                                                                                                                                                                              |
| received     | 1= Monitored individual received the intervention, 0= Monitored individual did not receive intervention                                                                                                                                                                                                                         |
| male         | 1= Household head is male, 0= Household head is female                                                                                                                                                                                                                                                                          |
| age          | Household head age                                                                                                                                                                                                                                                                                                              |
| nosp_lang    | 1= Household head speaks non-Spanish language, 0= Household head speaks Spanish language                                                                                                                                                                                                                                        |
| educ00       | 1= Household head has non-education, 0= Other                                                                                                                                                                                                                                                                                   |
| educ01       | 1= Household head has elementary education, 0= Other                                                                                                                                                                                                                                                                            |
| educ02       | 1= Household head has secondary education, 0= Other                                                                                                                                                                                                                                                                             |
| size         | Number of household members                                                                                                                                                                                                                                                                                                     |

| <b>Variable</b> | <b>Definition</b>                                                                        |
|-----------------|------------------------------------------------------------------------------------------|
| subject         | Monitored individual (Categories 1-2)<br>1= Pregnant women<br>2= Child under 2 years old |
| vaccine_int     | 1= Vaccine intervention, 0= Other intervention                                           |
| distance        | Distance to the health center (in minutes)                                               |
| mun             | Municipality (Categories 1-2)<br>1= Municipality 1<br>2= Municipality 2                  |
| community       | Community Identifier                                                                     |
| distance_o      | 1= Distance to the health center imputed, 0= Other                                       |
| educ_o          | 1= Household head education imputed, 0= Other                                            |
